# Supplementary material for: Hydrogen sulfide limits neutrophil transmigration, inflammation, and oxidative burst in lipopolysaccharide-induced acute lung injury
Source: PubMed Central journal article supplement (PMC6168479; doi:10.1038/s41598-018-33101-x), 2018-10-02
Supplement: 41598_2018_33101_MOESM1_ESM.pdf [file 41598_2018_33101_MOESM1_ESM.pdf]

# Hydrogen sulfide limits neutrophil transmigration, inflammation, and oxidative burst in lipopolysaccharide-induced acute lung injury

Simone Faller<sup>\*,†</sup>, Florian Hausler<sup>†</sup>, Andreas Goefft, Marc-Nicolas André von Itter, Veronica Gyllenram, Alexander Hoetzel, and Sashko G Spassov

Department of Anesthesiology and Critical Care Medicine, Medical Center – University of Freiburg, Faculty of Medicine, University of Freiburg, Germany

\*corresponding author:  
simone.faller@uniklinik-freiburg.de

<sup>†</sup>both authors contributed equally to the manuscript

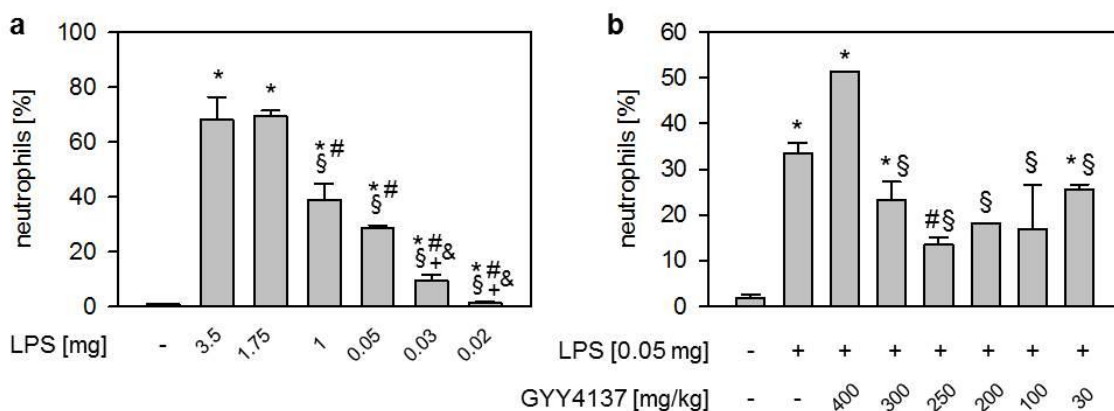

## Supplementary Figure S1.

### Effect of varying LPS and GYY4137 doses on neutrophil influx into the BAL.

(a) Mice were nebulised with LPS (dissolved in 5 ml PBS) in concentrations ranging from 3.5 to 0 mg. All mice were euthanised after another 6 h. The relative amount of neutrophils in the bronchoalveolar lavage was determined by cytopsin analysis. Data represent means  $\pm$  SEM for n=2-6/group. ANOVA (Tukey's post hoc test), \*P<0.05 vs. control; #P<0.05 vs. LPS 3.5 mg; \$P<0.05 vs. LPS 1.75 mg; +P<0.05 vs. LPS 0.1 mg; &P<0.05 vs. LPS 0.05 mg.

(b) Control mice received 25  $\mu$ l/g PBS i.p. and were nebulised 1 h later with 5 ml PBS. The LPS treated mice received 25  $\mu$ l/g PBS i.p. and were nebulised 1 h later with 0.05 mg LPS (dissolved in 5 ml PBS), while the LPS+GY4137 groups were treated with 400, 300, 250, 200, 100 and 30 mg/kg GYY4137 i.p. as indicated and were nebulised 1 h later with 0.05 mg LPS. All mice were euthanised 6 h after LPS treatment. The relative amount of neutrophils in the bronchoalveolar lavage was determined by cytopsin analysis. Data represent means  $\pm$  SEM for n=1-4/group. ANOVA (Tukey's post hoc test), \*P<0.05 vs. control; #P<0.05 vs. LPS; \$P<0.05 vs. LPS+400mg/kg GYY.
